# Supplementary material
Source: HighWire-hosted journal article supplement (https://qualitysafety.bmj.com/content/29/9/774)
Supplement: inline-supplementary-material-1 [file inline-supplementary-material-1.pdf]

**Supplementary Table 1:** Quality improvement strategies included in sustained and not sustained interventions

|                                       | N of trials with QI strategy | Sustained | Not Sustained |
|---------------------------------------|------------------------------|-----------|---------------|
| Median QI strategies per intervention |                              | 3.5       | 3             |
| <b>Quality Improvement Strategy</b>   |                              |           |               |
| Audit and feedback                    | 13                           | 10 (77%)  | 3 (23%)       |
| Case management                       | 51                           | 22 (43%)  | 29 (57%)      |
| Clinician education                   | 29                           | 21 (72%)  | 8 (28%)       |
| Clinician reminders                   | 21                           | 12 (57%)  | 9 (43%)       |
| Electronic patient records            | 18                           | 8 (44%)   | 10 (56%)      |
| Facilitated relay                     | 18                           | 6 (33%)   | 12 (67%)      |
| Patient education                     | 58                           | 31 (53%)  | 27 (47%)      |
| Patient reminders                     | 24                           | 13 (54%)  | 11 (46%)      |
| Promotion of self-management          | 56                           | 21 (38%)  | 35 (63%)      |
| Team changes                          | 40                           | 22 (55%)  | 18 (45%)      |
| Continuous quality improvement        | 2                            | 1 (50%)   | 1 (50%)       |
| Financial incentives                  | 3                            | 1 (33%)   | 2 (67%)       |
